# Supplementary material for: Transcriptome Analysis Reveals Distinct Responses to Physiologic versus Toxic Manganese Exposure in Human Neuroblastoma Cells
Source: Front Genet. 2019 Jul 24;10:676. doi: 10.3389/fgene.2019.00676 (PMC6668488; doi:10.3389/fgene.2019.00676)
Supplement: Supplementary file 3 [file Table_3.xlsx]

## Sheet: Table S3
Table S3: Leading edge genes in protein secretion gene set enriched by adaptive Mn exposure (0 vs 10μM, limma t-test)
Gene Set	Hallmark_Protein_Secretion
Enrichment Score (ES)	0.479601
Normalized Enrichment Score (NES)	1.83042
Nominal P-value	0.00331675
FDR q-value	0.00839546
Gene_name	Gene_description	Mn.1.0	Mn.2.0	Mn.3.0	Mn.1.10	Mn.2.10	Mn.3.10	P-value
BET1	Homo sapiens Bet1 golgi vesicular membrane trafficking protein	9.54	9.55	9.55	9.64	9.74	9.75	0.0154613
ARFGAP3	Homo sapiens ADP-ribosylation factor GTPase activating protein 3	7.66	7.63	7.65	7.77	7.9	7.72	0.0359056
ADAM10	Homo sapiens ADAM metallopeptidase domain 10	8.69	8.64	8.67	8.84	8.85	8.72	0.0417188
CLTC	Homo sapiens clathrin, heavy chain (Hc)	6.75	6.57	6.73	7	6.74	6.8	0.0694996
RAB14	Homo sapiens RAB14, member RAS oncogene family	12.45	12.33	12.3	12.53	12.46	12.42	0.108689
ATP7A	Homo sapiens ATPase, Cu++ transporting, alpha polypeptide	7.97	7.9	7.98	8.1	8	8.05	0.108711
TMX1	Homo sapiens thioredoxin-related transmembrane protein 1	11.23	11.07	11.05	11.25	11.19	11.21	0.148109
KIF1B	Homo sapiens kinesin family member 1B	12.09	11.96	11.98	12.15	12.06	12.1	0.149119
NAPG	Homo sapiens N-ethylmaleimide-sensitive factor attachment protein, gamma	10.89	10.78	10.73	11.01	10.83	10.88	0.150864
COG2	Homo sapiens component of oligomeric golgi complex 2	7.71	7.64	7.73	7.72	7.78	7.81	0.205994
ARFGEF1	Homo sapiens ADP-ribosylation factor guanine nucleotide-exchange factor 1	12.06	11.95	11.9	12.11	12.01	12.02	0.250083
LAMP2	Homo sapiens lysosomal-associated membrane protein 2	9.25	9.06	9.08	9.25	9.17	9.21	0.251303
STX7	Homo sapiens syntaxin 7	9.9	9.75	9.76	9.93	9.82	9.89	0.253099
MAPK1	Homo sapiens mitogen-activated protein kinase 1	9.13	9.02	9	9.08	9.18	9.1	0.274581
AP3B1	Homo sapiens adaptor-related protein complex 3, beta 1 subunit	6.56	6.52	6.51	6.46	6.71	6.65	0.304761
RAB9A	Homo sapiens RAB9A, member RAS oncogene family	7.55	7.69	7.58	7.63	7.65	7.74	0.306349
VPS4B	Homo sapiens vacuolar protein sorting 4 homolog B	11.99	11.83	11.71	12.03	11.88	11.87	0.321332
RAB22A	Homo sapiens RAB22A, member RAS oncogene family	11.5	11.4	11.28	11.6	11.39	11.43	0.323961
CLN5	Homo sapiens ceroid-lipofuscinosis, neuronal 5	9.68	9.56	9.53	9.69	9.6	9.67	0.32718
RAB5A	Homo sapiens RAB5A, member RAS oncogene family	8.94	8.77	8.8	8.86	8.89	8.95	0.341539
TMED2	Homo sapiens transmembrane emp24 domain trafficking protein 2	13.01	12.9	12.84	13.01	12.97	12.95	0.350694
GOSR2	Homo sapiens golgi SNAP receptor complex member 2	10.35	10.32	10.34	10.36	10.41	10.39	0.362233
VAMP3	Homo sapiens vesicle-associated membrane protein 3	11.06	10.9	10.95	11.04	11.01	11.03	0.364806
USO1	Homo sapiens USO1 vesicle transport factor	6.99	6.68	6.73	6.94	6.79	6.91	0.368648
ARFGEF2	Homo sapiens ADP-ribosylation factor guanine nucleotide-exchange factor 2	12.02	11.97	11.93	12.05	12.03	11.99	0.384799
STX12	Homo sapiens syntaxin 12	11.39	11.34	11.24	11.44	11.32	11.38	0.385562
AP1G1	Homo sapiens adaptor-related protein complex 1, gamma 1 subunit	6.56	6.77	6.83	6.81	6.88	6.69	0.387562
PAM	Homo sapiens peptidylglycine alpha-amidating monooxygenase	7.76	7.53	7.54	7.66	7.63	7.72	0.42449
TMED10	Homo sapiens transmembrane emp24-like trafficking protein 10 (yeast)	13.19	13.1	13.04	13.19	13.13	13.13	0.517621
SH3GL2	Homo sapiens SH3-domain GRB2-like 2	6.67	6.65	6.6	6.62	6.74	6.65	0.614312
ZW10	Homo sapiens zw10 kinetochore protein	10.68	10.62	10.6	10.64	10.65	10.69	0.63423
